# Supplementary material for: Investigation on the neutral and anionic BxAlyH2 (x + y = 7, 8, 9) clusters using density functional theory combined with photoelectron spectroscopy
Source: Royal Society of Chemistry journal article supplement (doi:10.1039/c6cp03077g), 2016-01-01

## Investigation on the neutral and anionic $B_xAl_yH_2$ ( $x + y = 7, 8, 9$ ) clusters using density functional theory combined with photoelectron spectroscopy

Li-Ping Ding,<sup>1,\*</sup> Peng Shao,<sup>1</sup> Cheng Lu,<sup>2,3,\*</sup> Fang-Hui Zhang,<sup>1</sup> Lei Ding,<sup>1</sup> and Tao Li Yuan<sup>1</sup>

<sup>1</sup>Department of Optoelectronic Science & Technology, College of Electrical & Information Engineering, Shaanxi University of Science & Technology, Xi'an 710021, China

<sup>2</sup>Department of Physics, Nanyang Normal University, Nanyang, 473061, China.

<sup>3</sup>Beijing Computational Science Research Center, Beijing, 100084, China.

**Table S1** The calculated VDEs for next low-lying state of anionic  $B_xAl_yH_2$  ( $x + y = 7, 8, 9$ ) at B3LYP/6-311+G\* level of theory. All energies are in eV.

| Isomers        | VDE  | Isomers        | VDE  | Isomers        | VDE  |
|----------------|------|----------------|------|----------------|------|
| $BAI_6H_2^-$   | 3.10 | $BAI_7H_2^-$   | 2.94 | $BAI_8H_2^-$   | 2.95 |
| $B_2AI_5H_2^-$ | 3.10 | $B_2AI_6H_2^-$ | 2.36 | $B_2AI_7H_2^-$ | 2.86 |
| $B_3AI_4H_2^-$ | 2.94 | $B_3AI_5H_2^-$ | 2.05 | $B_3AI_6H_2^-$ | 2.84 |
| $B_4AI_3H_2^-$ | 2.47 | $B_4AI_4H_2^-$ | 2.97 | $B_4AI_5H_2^-$ | 2.95 |
| $B_5AI_2H_2^-$ | 2.52 | $B_5AI_3H_2^-$ | 2.39 | $B_5AI_4H_2^-$ | 2.83 |
| $B_6AIH_2^-$   | 3.69 | $B_6AI_2H_2^-$ | 2.59 |                |      |
|                |      | $B_7AIH_2^-$   | 2.40 |                |      |

\*Correspondence to: Li-Ping Ding, Shaanxi University of Science & Technology, Xi'an 710021, China.  
E-mail address: scu\_ding@163.com (L. P. Ding). scu\_lucheng@163.com (Cheng Lu)

**Table S2** Natural charge populations (NPA) for the Al, B and H atoms of the most stable neutral  $B_xAl_yH_2$  ( $x + y = 7$ ) clusters.

| $x + y = 7$     | $Al_7H_2$ | $BAl_6H_2$ | $B_2Al_5H_2$ | $B_3Al_4H_2$ | $B_4Al_3H_2$ | $B_5Al_2H_2$ | $B_6AlH_2$ | $B_7H_2$ |
|-----------------|-----------|------------|--------------|--------------|--------------|--------------|------------|----------|
| B <sub>1</sub>  |           | -1.682     | -0.853       | -0.255       | -0.207       | -0.553       | -0.086     | 0.050    |
| B <sub>2</sub>  |           |            | -1.400       | -1.057       | -0.826       | 0.193        | -0.346     | 0.133    |
| B <sub>3</sub>  |           |            |              | -0.696       | -0.132       | -0.167       | -0.065     | -0.049   |
| B <sub>4</sub>  |           |            |              |              | -0.645       | 0.232        | -0.133     | -0.230   |
| B <sub>5</sub>  |           |            |              |              |              | -0.312       | -0.346     | -0.056   |
| B <sub>6</sub>  |           |            |              |              |              |              | -0.086     | 0.128    |
| B <sub>7</sub>  |           |            |              |              |              |              |            | 0.065    |
| Al <sub>1</sub> | 0.085     | 0.439      | 0.567        | 0.518        | 0.393        | 0.758        | 1.020      |          |
| Al <sub>2</sub> | 0.246     | 0.641      | 0.018        | 0.399        | 0.655        | 0.827        |            |          |
| Al <sub>3</sub> | -0.011    | 0.306      | 0.455        | 0.480        | 0.692        |              |            |          |
| Al <sub>4</sub> | 0.044     | 0.393      | 0.506        | 0.543        |              |              |            |          |
| Al <sub>5</sub> | -0.011    | 0.030      | 0.983        |              |              |              |            |          |
| Al <sub>6</sub> | 0.152     | 0.149      |              |              |              |              |            |          |
| Al <sub>7</sub> | 0.138     |            |              |              |              |              |            |          |
| H <sub>1</sub>  | -0.333    | 0.051      | 0.046        | 0.004        | 0.064        | 0.061        | 0.021      | -0.020   |
| H <sub>2</sub>  | -0.310    | -0.326     | -0.323       | 0.064        | 0.006        | -0.041       | 0.021      | -0.022   |

**Table S3** Natural charge populations (NPA) for the Al, B and H atoms of the most stable anionic  $B_xAl_yH_2$  ( $x + y = 7$ ) clusters.

| $x + y = 7$     | $Al_7H_2^-$ | $BAl_6H_2^-$ | $B_2Al_5H_2^-$ | $B_3Al_4H_2^-$ | $B_4Al_3H_2^-$ | $B_5Al_2H_2^-$ | $B_6AlH_2^-$ | $B_7H_2^-$ |
|-----------------|-------------|--------------|----------------|----------------|----------------|----------------|--------------|------------|
| B <sub>1</sub>  |             | -1.303       | -0.904         | -0.548         | -0.612         | -0.290         | -0.159       | 0.008      |
| B <sub>2</sub>  |             |              | -1.307         | -1.106         | -0.421         | -0.479         | -0.410       | -0.207     |
| B <sub>3</sub>  |             |              |                | -0.548         | -0.905         | -0.429         | -0.163       | 0.008      |
| B <sub>4</sub>  |             |              |                |                | -0.362         | -0.467         | -0.271       | -0.370     |
| B <sub>5</sub>  |             |              |                |                |                | -0.379         | -0.410       | -0.207     |
| B <sub>6</sub>  |             |              |                |                |                |                | -0.159       | 0.088      |
| B <sub>7</sub>  |             |              |                |                |                |                |              | -0.260     |
| Al <sub>1</sub> | -0.077      | 0.161        | 0.461          | 0.305          | 0.524          | 0.598          | 0.594        |            |
| Al <sub>2</sub> | 0.206       | 0.146        | 0.395          | 0.326          | 0.363          | 0.476          |              |            |
| Al <sub>3</sub> | -0.244      | -0.142       | -0.030         | 0.252          | 0.411          |                |              |            |
| Al <sub>4</sub> | -0.165      | 0.153        | 0.423          | 0.326          |                |                |              |            |
| Al <sub>5</sub> | -0.165      | 0.462        | 0.311          |                |                |                |              |            |
| Al <sub>6</sub> | 0.206       | -0.074       |                |                |                |                |              |            |
| Al <sub>7</sub> | -0.305      |              |                |                |                |                |              |            |
| H <sub>1</sub>  | -0.363      | -0.047       | 0.015          | -0.004         | -0.034         | -0.038         | -0.011       | -0.030     |
| H <sub>2</sub>  | -0.363      | -0.355       | -0.365         | -0.004         | 0.036          | 0.006          | -0.011       | -0.030     |

**Table S4** Natural charge populations (NPA) for the Al, B and H atoms of the most stable neutral  $B_xAl_yH_2$  ( $x + y = 8$ ) clusters.

| $x + y = 8$     | $Al_8H_2$ | $BAl_7H_2$ | $B_2Al_6H_2$ | $B_3Al_5H_2$ | $B_4Al_4H_2$ | $B_5Al_3H_2$ | $B_6Al_2H_2$ | $B_7AlH_2$ | $B_8H_2$ |
|-----------------|-----------|------------|--------------|--------------|--------------|--------------|--------------|------------|----------|
| B <sub>1</sub>  |           | -1.21      | -1.089       | -0.729       | -1.244       | -0.476       | -0.234       | -0.190     | -0.104   |
| B <sub>2</sub>  |           |            | -1.808       | -1.721       | -0.391       | -0.476       | -0.369       | -0.190     | 0.148    |
| B <sub>3</sub>  |           |            |              | -0.508       | -0.476       | -0.411       | -0.274       | 0.053      | -0.104   |
| B <sub>4</sub>  |           |            |              |              | -0.341       | -0.411       | -0.370       | -0.386     | 0.092    |
| B <sub>5</sub>  |           |            |              |              |              | -0.752       | -0.277       | 0.032      | 0.092    |
| B <sub>6</sub>  |           |            |              |              |              |              | -0.115       | 0.032      | 0.069    |
| B <sub>7</sub>  |           |            |              |              |              |              |              | -0.183     | 0.069    |
| B <sub>8</sub>  |           |            |              |              |              |              |              |            | -0.261   |
| Al <sub>1</sub> | -0.154    | 0.454      | 0.736        | 0.748        | 0.955        | 0.930        | 0.704        | 0.743      |          |
| Al <sub>2</sub> | 0.361     | 0.083      | 0.743        | 0.748        | 0.703        | 0.807        | 0.882        |            |          |
| Al <sub>3</sub> | -0.153    | 0.231      | 0.478        | 0.776        | 0.530        | 0.790        |              |            |          |
| Al <sub>4</sub> | 0.388     | 0.071      | 0.763        | 0.647        | 0.567        |              |              |            |          |
| Al <sub>5</sub> | -0.148    | 0.082      | 0.614        | 0.401        |              |              |              |            |          |
| Al <sub>6</sub> | 0.388     | 0.275      | 0.199        |              |              |              |              |            |          |
| Al <sub>7</sub> | -0.115    | 0.358      |              |              |              |              |              |            |          |
| Al <sub>8</sub> | 0.088     |            |              |              |              |              |              |            |          |
| H <sub>1</sub>  | -0.328    | -0.181     | -0.309       | -0.337       | 0.004        | -0.00002     | -0.001       | 0.045      | -0.031   |
| H <sub>2</sub>  | -0.328    | -0.162     | -0.327       | -0.025       | -0.309       | -0.00002     | 0.055        | 0.045      | 0.029    |

**Table S5** Natural charge populations (NPA) for the Al, B and H atoms of the most stable anionic  $B_xAl_yH_2$  ( $x + y = 8$ ) clusters.

| $x + y = 8$     | $Al_8H_2^-$ | $BAl_7H_2^-$ | $B_2Al_6H_2^-$ | $B_3Al_5H_2^-$ | $B_4Al_4H_2^-$ | $B_5Al_3H_2^-$ | $B_6Al_2H_2^-$ | $B_7AlH_2^-$ | $B_8H_2^-$ |
|-----------------|-------------|--------------|----------------|----------------|----------------|----------------|----------------|--------------|------------|
| B <sub>1</sub>  |             | -2.513       | -1.190         | -0.758         | -0.365         | -0.427         | -0.290         | -0.416       | -0.071     |
| B <sub>2</sub>  |             |              | -1.758         | -1.857         | -0.365         | -0.243         | -0.201         | -0.069       | -0.199     |
| B <sub>3</sub>  |             |              |                | -0.430         | -1.276         | -0.626         | -0.326         | -0.069       | -0.210     |
| B <sub>4</sub>  |             |              |                |                | -0.972         | -0.626         | -0.558         | -0.100       | -0.048     |
| B <sub>5</sub>  |             |              |                |                |                | -0.791         | -0.219         | -0.462       | 0.024      |
| B <sub>6</sub>  |             |              |                |                |                |                | -0.656         | -0.280       | -0.135     |
| B <sub>7</sub>  |             |              |                |                |                |                |                | -0.280       | -0.137     |
| B <sub>8</sub>  |             |              |                |                |                |                |                |              | -0.203     |
| Al <sub>1</sub> | -0.308      | 0.456        | 0.635          | 0.583          | 0.515          | 0.569          | 0.749          | 0.705        |            |
| Al <sub>2</sub> | 0.061       | 0.034        | 0.659          | 0.548          | 0.465          | 0.550          | 0.490          |              |            |
| Al <sub>3</sub> | -0.261      | 0.265        | 0.345          | 0.608          | 0.515          |                |                |              |            |
| Al <sub>4</sub> | 0.347       | 0.135        | 0.546          | 0.452          | 0.441          |                |                |              |            |
| Al <sub>5</sub> | -0.233      | 0.178        | 0.468          | 0.257          |                |                |                |              |            |
| Al <sub>6</sub> | 0.118       | 0.545        | -0.006         |                |                |                |                |              |            |
| Al <sub>7</sub> | -0.314      | 0.597        |                |                |                |                |                |              |            |
| Al <sub>8</sub> | 0.310       |              |                |                |                |                |                |              |            |
| H <sub>1</sub>  | -0.363      | -0.362       | -0.344         | -0.358         | 0.020          | 0.031          | 0.018          | -0.015       | -0.008     |
| H <sub>2</sub>  | -0.356      | -0.334       | -0.356         | -0.046         | 0.020          | 0.011          | -0.007         | -0.015       | -0.012     |

**Table S6** Natural charge populations (NPA) for the Al, B and H atoms of the most stable neutral  $B_xAl_yH_2$  ( $x + y = 9$ ) clusters.

| $x + y = 9$ | $Al_9H_2$ | $BAl_8H_2$ | $B_2Al_7H_2$ | $B_3Al_6H_2$ | $B_4Al_5H_2$ | $B_5Al_4H_2$ |
|-------------|-----------|------------|--------------|--------------|--------------|--------------|
| $B_1$       |           | -1.559     | -2.137       | -0.346       | -0.283       | -0.668       |
| $B_2$       |           |            | -1.984       | -0.897       | -0.654       | -0.347       |
| $B_3$       |           |            |              | -0.892       | -0.785       | -0.668       |
| $B_4$       |           |            |              |              | -1.887       | -0.347       |
| $B_5$       |           |            |              |              |              | -0.937       |
| $Al_1$      | -0.314    | 0.077      | 0.531        | 0.386        | 0.488        | 0.7561       |
| $Al_2$      | 0.135     | 0.201      | 0.850        | 0.494        | 0.766        | 0.568        |
| $Al_3$      | 0.193     | 0.077      | 0.851        | 0.350        | 0.766        | 0.869        |
| $Al_4$      | 0.263     | 0.159      | 0.530        | 0.523        | 0.708        | 0.767        |
| $Al_5$      | -0.115    | 0.158      | 0.767        | 0.010        | 0.833        |              |
| $Al_6$      | 0.171     | 0.456      | 0.641        | 0.280        |              |              |
| $Al_7$      | 0.231     | 0.068      | 0.641        |              |              |              |
| $Al_8$      | -0.129    | 0.643      |              |              |              |              |
| $Al_9$      | 0.160     |            |              |              |              |              |
| $H_1$       | -0.304    | -0.304     | -0.344       | 0.045        | 0.030        | 0.004        |
| $H_2$       | -0.291    | 0.025      | -0.344       | 0.047        | 0.018        | 0.004        |

**Table S7** Natural charge populations (NPA) for the Al, B and H atoms of the most stable anionic  $B_xAl_yH_2$  ( $x + y = 9$ ) clusters.

| $x + y = 9$     | $Al_9H_2^-$ | $BAl_8H_2^-$ | $B_2Al_7H_2^-$ | $B_3Al_6H_2^-$ | $B_4Al_5H_2^-$ | $B_5Al_4H_2^-$ |
|-----------------|-------------|--------------|----------------|----------------|----------------|----------------|
| B <sub>1</sub>  |             | -2.644       | -1.212         | -0.832         | -0.355         | -1.035         |
| B <sub>2</sub>  |             |              | -2.076         | -0.832         | -0.717         | -0.236         |
| B <sub>3</sub>  |             |              |                | -1.010         | -0.741         | -0.234         |
| B <sub>4</sub>  |             |              |                |                | -1.985         | -0.410         |
| B <sub>5</sub>  |             |              |                |                |                | -1.454         |
| Al <sub>1</sub> | -0.408      | 0.309        | -0.025         | 0.295          | 0.271          | 0.708          |
| Al <sub>2</sub> | 0.103       | 0.188        | 0.565          | 0.017          | 0.679          | 0.531          |
| Al <sub>3</sub> | 0.013       | 0.304        | 0.422          | 0.005          | 0.680          | 0.537          |
| Al <sub>4</sub> | 0.076       | 0.447        | 0.420          | 0.583          | 0.480          | 0.588          |
| Al <sub>5</sub> | -0.165      | 0.557        | 0.661          | 0.295          | 0.693          |                |
| Al <sub>6</sub> | -0.027      | -0.047       | 0.382          | 0.465          |                |                |
| Al <sub>7</sub> | 0.226       | 0.0830       | 0.208          |                |                |                |
| Al <sub>8</sub> | -0.139      | 0.448        |                |                |                |                |
| Al <sub>9</sub> | -0.017      |              |                |                |                |                |
| H <sub>1</sub>  | -0.344      | -0.340       | 0.008          | 0.007          | 0.014          | 0.004          |
| H <sub>2</sub>  | -0.319      | -0.305       | -0.353         | 0.007          | -0.0120        | 0.001          |

**Fig. S1** Equilibrium geometries of the low-lying isomers for neutral and anionic  $B_xAl_yH_2$  ( $x + y = 7$ ) clusters at B3LYP/6-311+G\* level of theory. The pink spheres stand for aluminum atoms and the cyan ones for boron atoms.

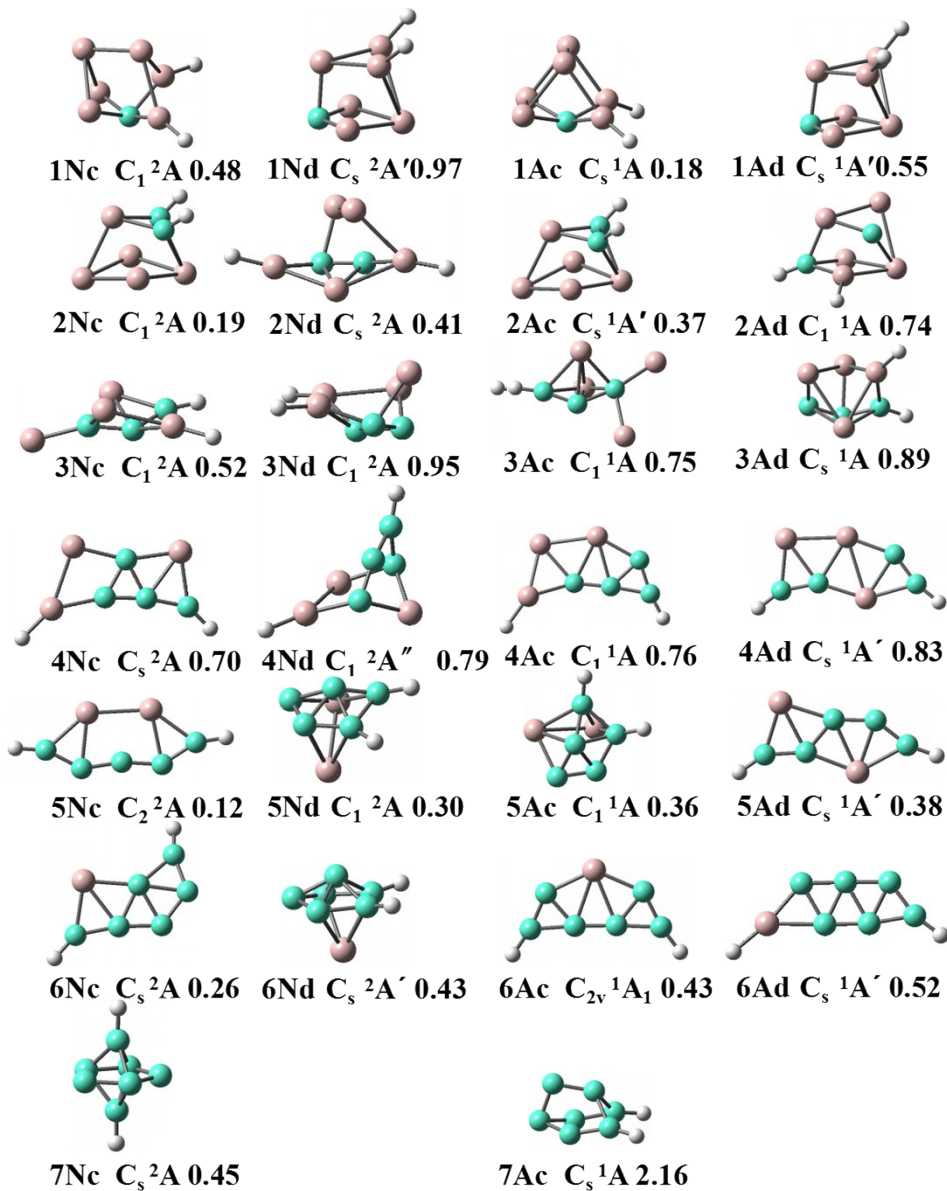

**Fig. S2** Equilibrium geometries of the low-lying isomers for neutral and anionic  $B_xAl_yH_2$  ( $x + y = 8$ ) clusters at B3LYP/6-311+G\* level of theory. The pink spheres stand for aluminum atoms and the cyan ones for boron atoms.

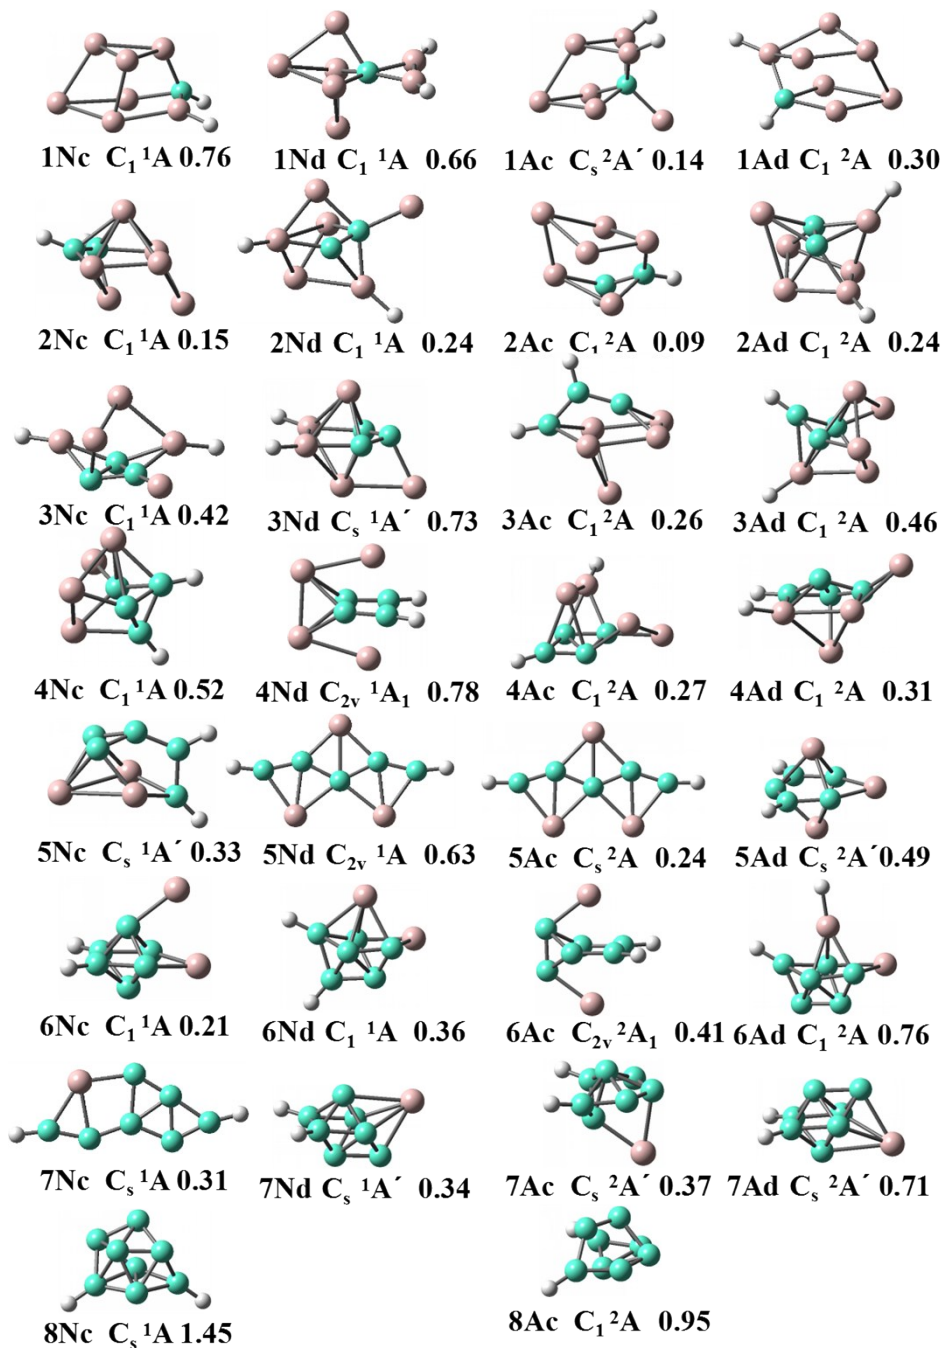



**Fig. S3** Equilibrium geometries of the low-lying isomers for neutral and anionic  $B_xAl_yH_2$  ( $x + y = 9$ ) clusters at B3LYP/6-311+G\* level of theory. The pink spheres stand for aluminum atoms and the cyan ones for boron atoms.

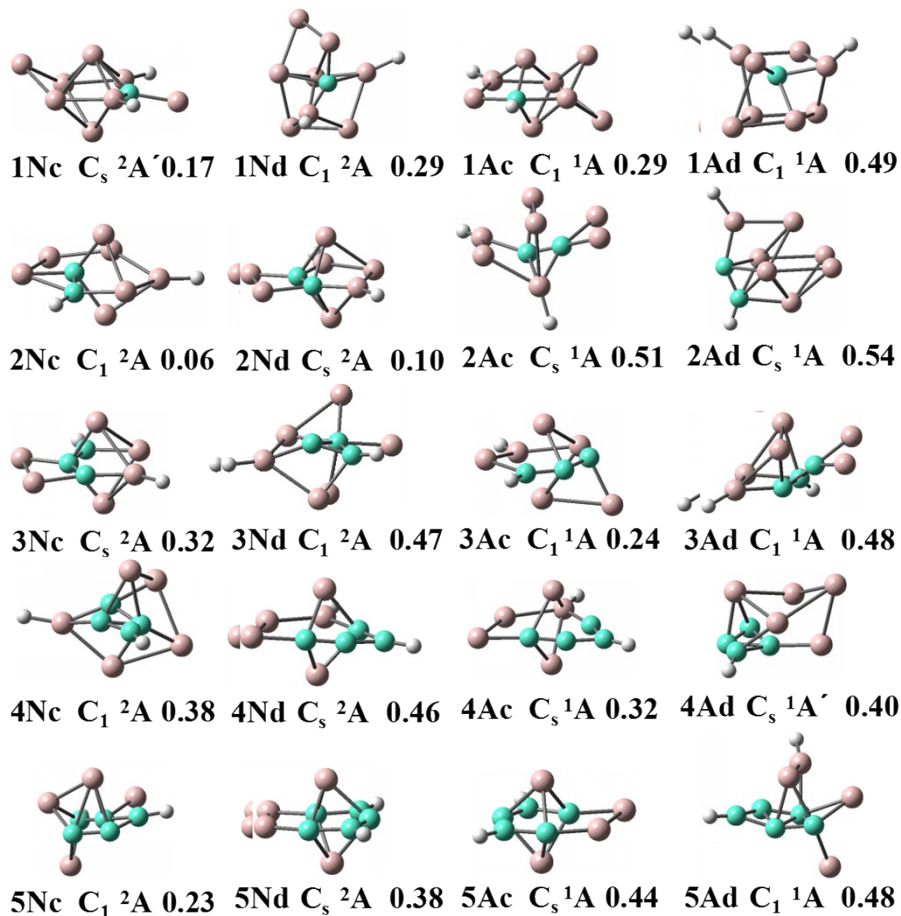

**Fig. S4** Simulated spectra for the next low-lying isomers of anionic  $B_xAl_yH_2$  ( $x + y = 7$ ) clusters at B3LYP/6-311+G\* level of theory.

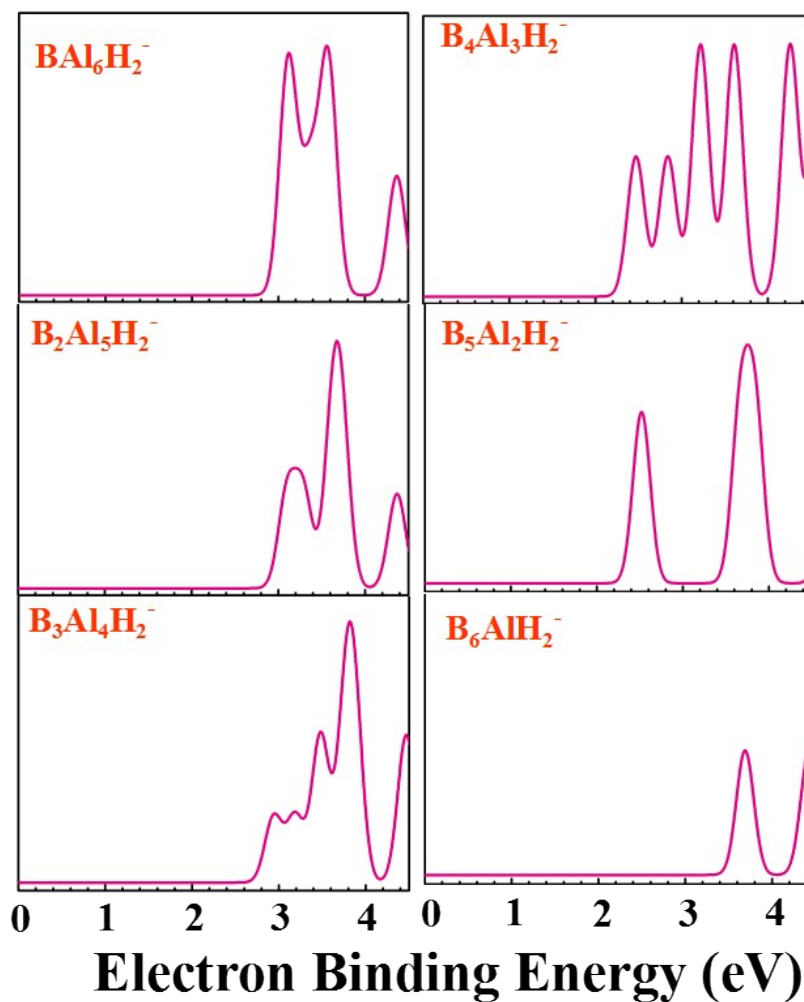

**Fig. S5** Simulated spectra for the next low-lying isomers of anionic  $B_xAl_yH_2$  ( $x + y = 8$ ) clusters at B3LYP/6-311+G\* level of theory.

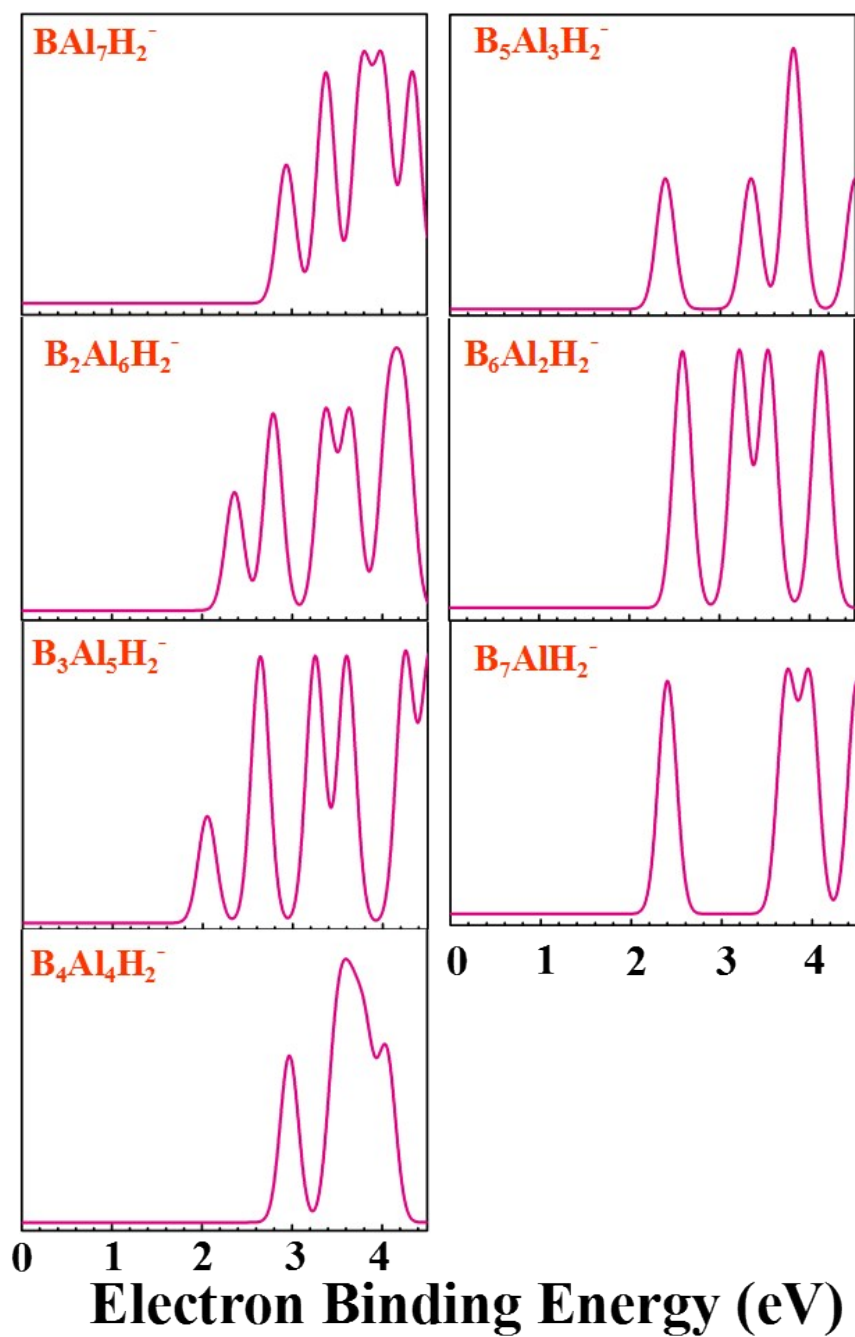

**Fig. S6** Simulated spectra for the next low-lying isomers of anionic  $B_xAl_yH_2$  ( $x + y = 9$ ) clusters at B3LYP/6-311+G\* level of theory.

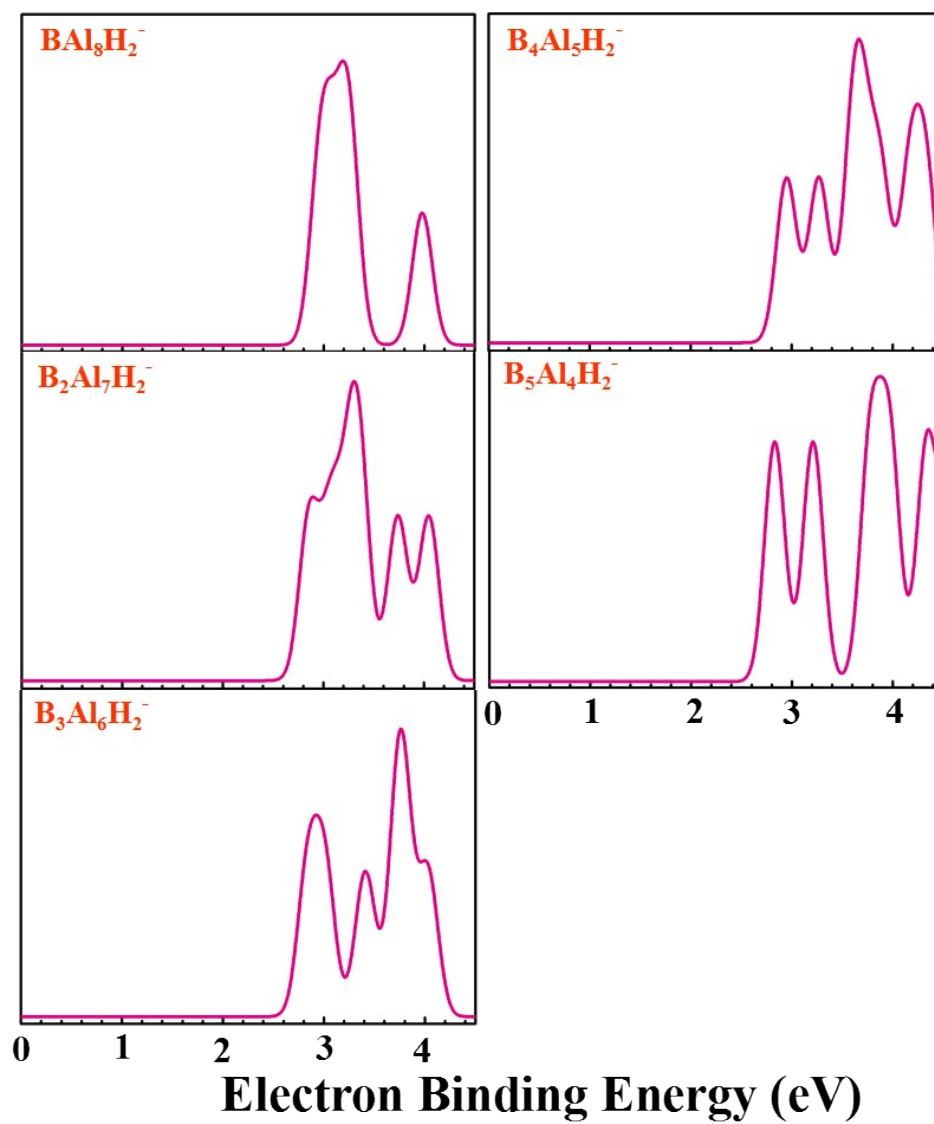

**Fig. S7** The four next highest occupied molecular orbitals of ground state anionic  $B_xAl_yH_2$  ( $x + y = 7$ ) clusters at B3LYP/6-311+G\* level of theory.

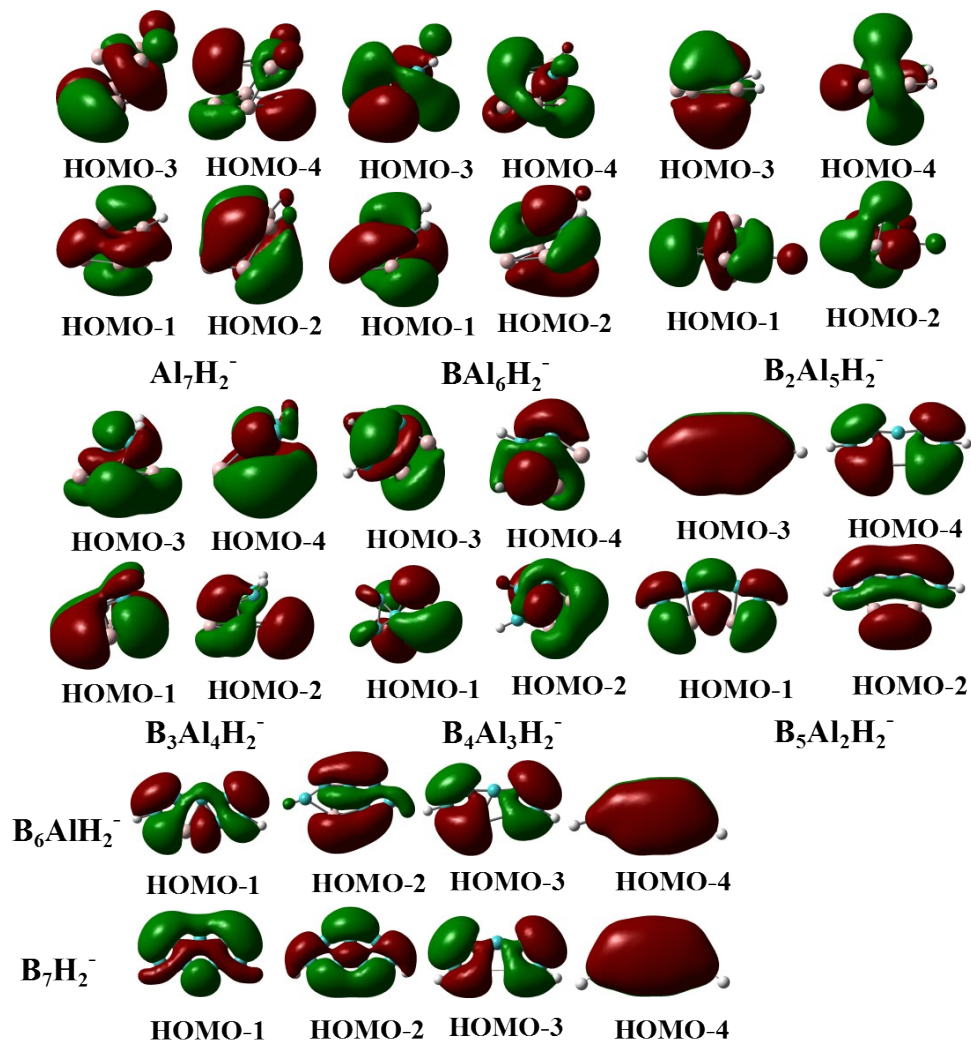

**Fig. S8** The four next highest occupied molecular orbitals of ground state anionic  $B_xAl_yH_2$  ( $x + y = 8$ ) clusters at B3LYP/6-311+G\* level of theory.

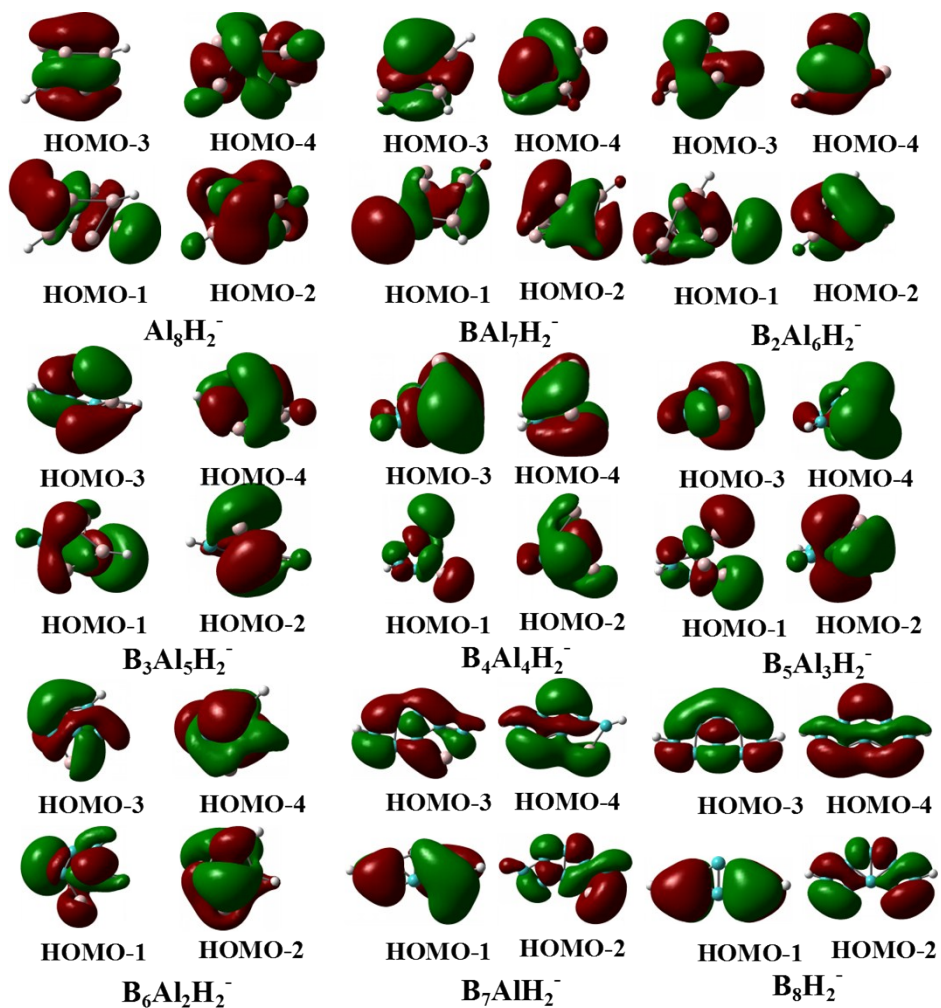

**Fig. S9** The four next highest occupied molecular orbitals of ground state anionic  $B_xAl_yH_2$  ( $x + y = 9$ ) clusters at B3LYP/6-311+G\* level of theory.

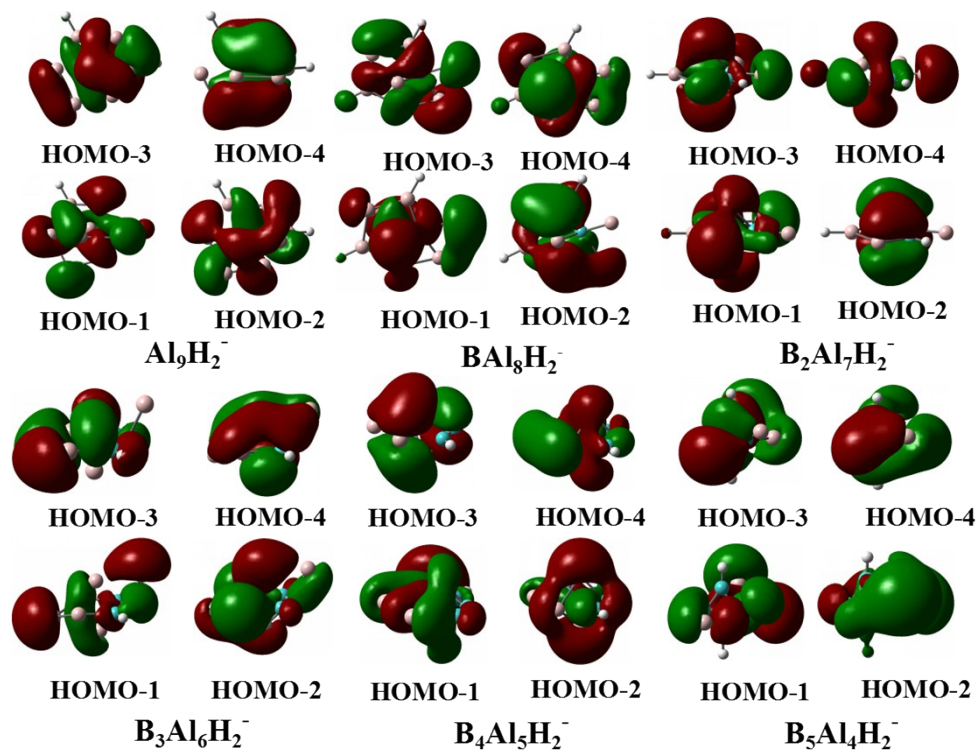

Supplement: c6cp03077g1.pdf [file c6cp03077g1.pdf]
